# Supplementary material for: Hypercrosslinked porous polymers hybridized with graphene oxide for water treatment: dye adsorption and degradation
Source: Royal Society of Chemistry journal article supplement (doi:10.1039/c8ra01620h), 2018-01-01
Supplement: c8ra01620h1.pdf [file c8ra01620h1.pdf]

## Supplementary Information

for

### **Hypercrosslinked porous polymers hybridized with graphene oxide for water treatment: dye adsorption and degradation**

Yipeng Huang<sup>a,1</sup>, Guihua Ruan<sup>a,b,\*</sup>, Yuji Ruan<sup>c,1</sup>, Wenjuan Zhang<sup>a</sup>, Xianxian Li<sup>a</sup>, Fuyou Du<sup>a,b</sup>, Cunjie Hu<sup>a</sup>, Jianping Li<sup>a,b</sup>

a. Colleges and Universities Key Laboratory of Food Safety and Detection, College of Chemistry and Bioengineering, Guilin University of Technology, Guilin, Guangxi, 541004

b. Collaborative Innovation Center for Water Pollution Control and Water Safety in Karst Area, Guilin, Guangxi, 541004

c. School of Biomedical Engineering, Southern Medical University, Guangzhou, Guangdong, 510515

\*Corresponding author: College of Chemistry and Bioengineering, Guilin University of Technology, Guilin, Guangxi, 541004

E-mail: [guihuaruan@hotmail.com](mailto:guihuaruan@hotmail.com) (G. Ruan)

<sup>1</sup> These authors contributed equally.

## Supplementary Figures

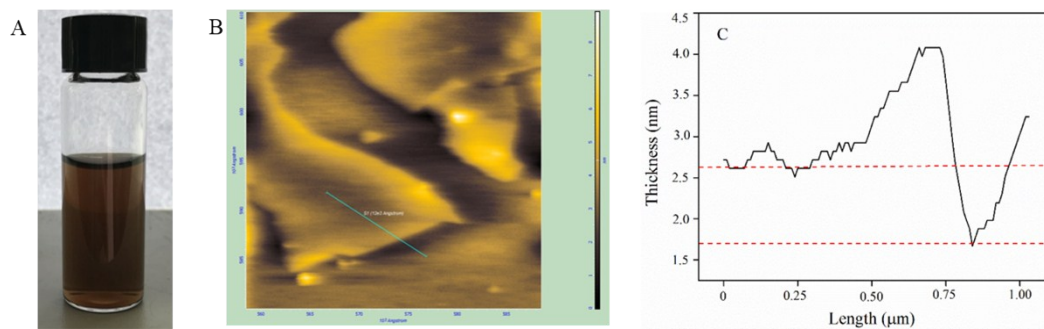

Fig. S1 Photograph of the PVP-GO aqueous suspension (A), and AFM image (B) and high profile (C) of the PVP-GO sheets.

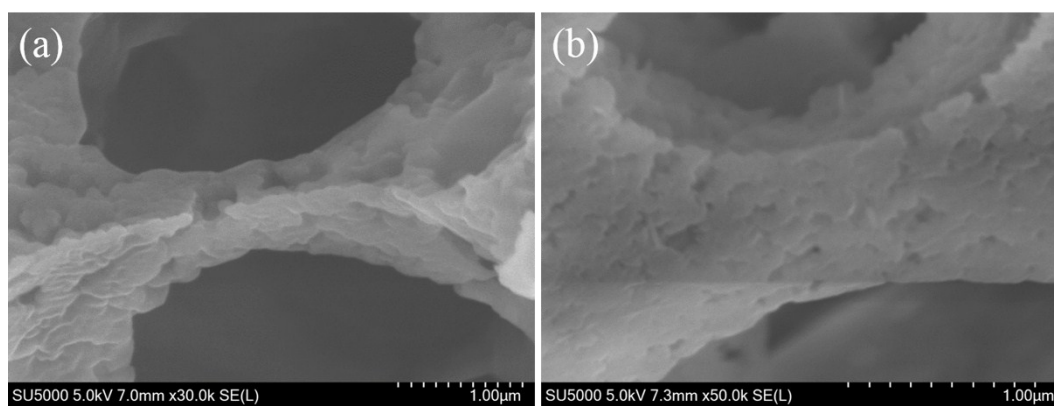

Fig. S2 SEM images for showing the nanoscale to submicroscale grooves on the pore walls in the as-prepared polyHIPEs/GO (a) and polyHIPEs<sub>(NH<sub>2</sub>)</sub>/GO (b).

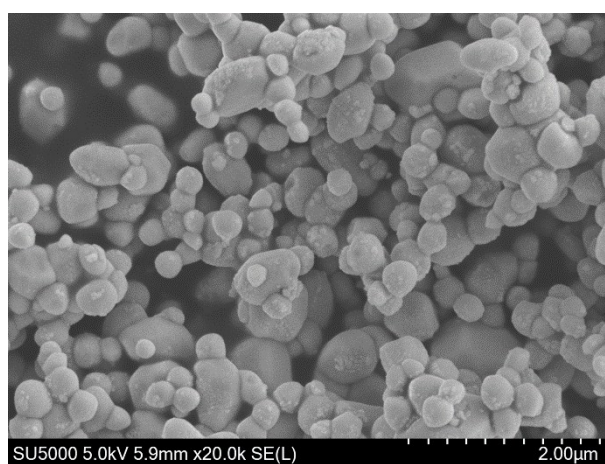

Fig. S3 The SEM image of the bared  $\text{Ag}_3\text{PO}_4$  particles.

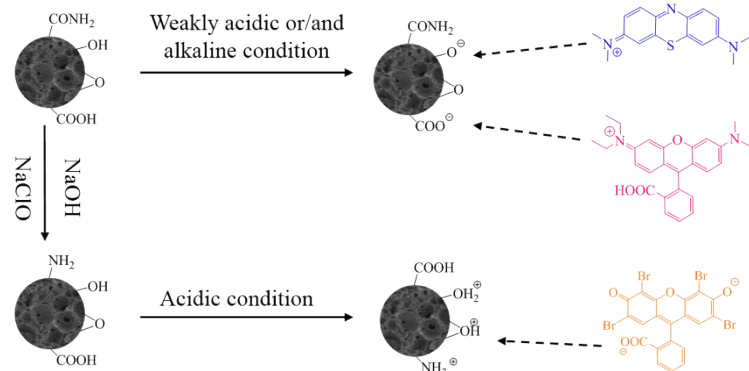

Fig. S4 Schematic illustration of the adsorption mechanism of dyes on polyHIPes/GO and polyHIPes<sub>(NH<sub>2</sub>)</sub>/GO.

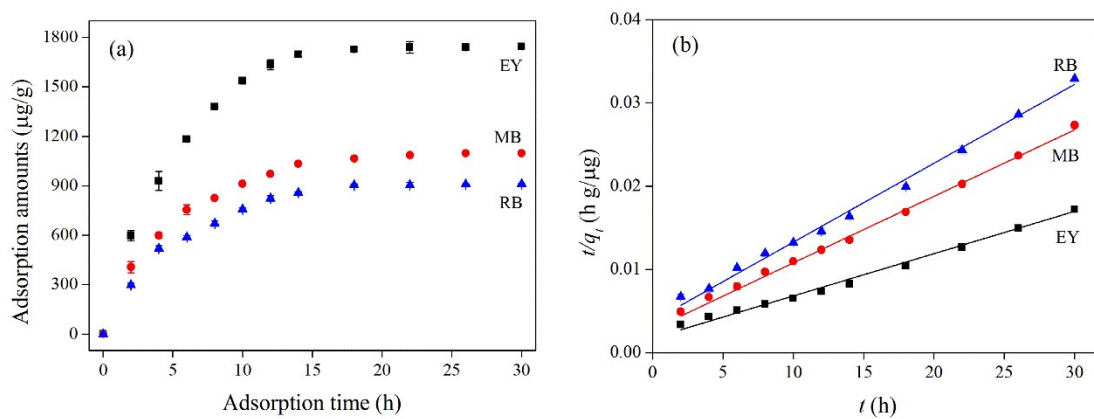

Fig. S5 (a) Adsorption amount of dyes versus contact time, (b) the pseudo-second-order kinetic curves of dyes.

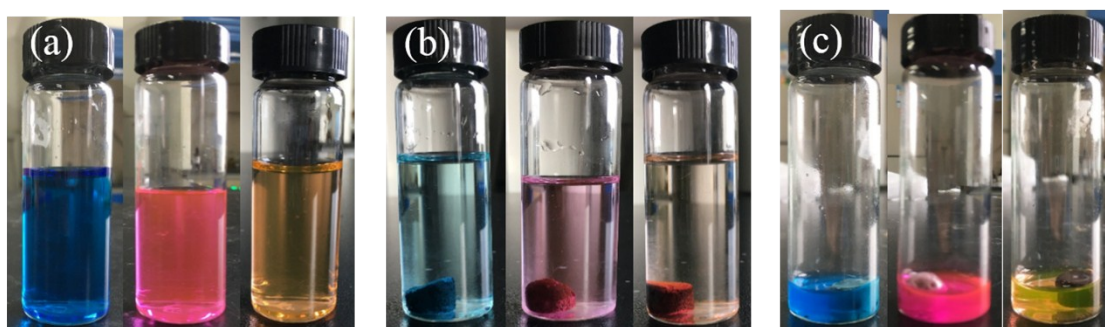

Fig. S6 Digital photographs of the MB, RB and EY solutions before adsorption (a), after adsorption for 14 h (b), and desorption in ethanol (c).

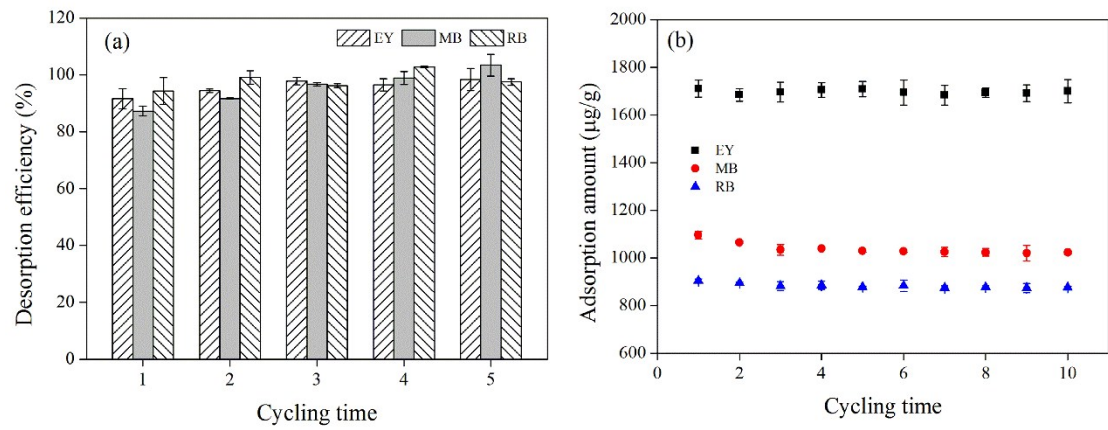

Fig. S7 The desorption efficiency of EY, MB and RB for the first 5 cycling time (a), and the cyclic performance of polyHIPEs/GO to MB and RB adsorption, and polyHIPEs<sub>(NH<sub>2</sub>)</sub>/GO to EY (b).

## Supplementary Tables

Tab. S1 The quantity used of AAm, DVB and PVP-GO in HIPE preparation

| Sample | AAm (mg) | DVB ( $\mu\text{L}$ ) | PVP-GO (mg) |
|--------|----------|-----------------------|-------------|
| 1      | 0        | 300                   | 10          |
| 2      | 50       | 300                   | 10          |
| 3      | 100      | 300                   | 10          |
| 4      | 100      | 0                     | 10          |
| 5      | 100      | 100                   | 10          |
| 6      | 100      | 300                   | 10          |
| 7      | 100      | 300                   | 0           |
| 8      | 100      | 300                   | 5           |
| 9      | 100      | 300                   | 10          |
| 10     | 100      | 300                   | 15          |

Notes: To maintain the total volume of oil phase unchanged, the dosage of EHA is 700, 600, and 400  $\mu\text{L}$  for sample 4, 5, and 6, respectively. Other reagents for other samples are the same as described in 2.3 in the text.

Tab. S2 Kinetics parameters for the adsorption of MB, RB using polyHIPEs/GO, and the adsorption of EY using polyHIPEs<sub>(NH<sub>2</sub>)</sub>/GO

| Dye | Pseudo-second-order kinetic equation       | R <sup>2</sup> | $q_e$ ( $\mu\text{g/g}$ ) | $k$ ( $\text{g } \mu\text{g}^{-1} \text{ h}^{-1}$ ) |
|-----|--------------------------------------------|----------------|---------------------------|-----------------------------------------------------|
| MB  | $t/q_t = 7.9977 \times 10^{-4} t + 0.0028$ | 0.9949         | 1250.3                    | $2.30 \times 10^{-4}$                               |
| RB  | $t/q_t = 9.4871 \times 10^{-4} t + 0.0038$ | 0.9990         | 1054.1                    | $2.38 \times 10^{-4}$                               |
| EY  | $t/q_t = 5.0830 \times 10^{-4} t + 0.0017$ | 0.9944         | 1967.3                    | $1.49 \times 10^{-4}$                               |

Tab. S3 Comparison of the dye adsorption performances of polyHIPEs/GO and polyHIPE<sub>S(NH<sub>2</sub>)</sub>/GO with other reported sorbents.

| Adsorbents                                                            | Dyes           | Adsorption capacity | Advantages                                                                                                                                                                               | Existing issues                                                                                                                                                                     | Ref.      |
|-----------------------------------------------------------------------|----------------|---------------------|------------------------------------------------------------------------------------------------------------------------------------------------------------------------------------------|-------------------------------------------------------------------------------------------------------------------------------------------------------------------------------------|-----------|
| Poly(1-vinylimidazole)/<br>88%graphene                                | MB             | 1910 mg/g           | High adsorption capacity                                                                                                                                                                 | The synthesis of the sorbent is time consuming (it takes about one week in a typical procedure); the sorbent is high-cost; the 2D sheets are inconvenient to recycle from solutions | 1         |
| Silicon/carbon/nitrogen hybrids                                       | MB             | 1327.7 mg/g         | High adsorption capacity                                                                                                                                                                 | The adsorption only feasible to triphenyl dyes; the powder-like sorbent is inconvenient to recycle from solutions                                                                   | 2         |
|                                                                       | Acid fuchsin   | 1084.5 mg/g         |                                                                                                                                                                                          |                                                                                                                                                                                     |           |
| Polyethylenimine/33%GO                                                | Amaranth       | 800 mg/g            | The adsorption capacity to acidic dyes is high; the 3D sorbent is very convenient to recycle from solutions                                                                              | The adsorption to basic dyes is low; the sorbent is high-cost and easy to collapse                                                                                                  | 3         |
|                                                                       | Orange G       | 300 mg/g            |                                                                                                                                                                                          |                                                                                                                                                                                     |           |
|                                                                       | RB             | 25 mg/g             |                                                                                                                                                                                          |                                                                                                                                                                                     |           |
| Chitosan/91%GO hydrogel                                               | MB             | 350 mg/g            | The sorbent shows broad-spectrum adsorption ability to both cationic and anionic dyes                                                                                                    | The very high GO content make this sorbent costly; the hydrogel based sorbent needs to preserve in water; the cycling performance is questioned                                     | 4         |
|                                                                       | EY             | 230 mg/g            |                                                                                                                                                                                          |                                                                                                                                                                                     |           |
| Poly(vinylbenzyl chloride-<br>divinylbenzene)/90%chitosan<br>hydrogel | Indigo Carmine | 118 mg/g            | The sorbent shows broad-spectrum adsorption ability to both cationic and anionic dyes                                                                                                    | The synthesis procedure is time consuming; the hydrogel based sorbent needs to preserve in water                                                                                    | 5         |
|                                                                       | Sunset Yellow  | 72 mg/g             |                                                                                                                                                                                          |                                                                                                                                                                                     |           |
|                                                                       | Rhodamine 6G   | 78 mg/g             |                                                                                                                                                                                          |                                                                                                                                                                                     |           |
| PolyHIPEs/1.35%GO,<br>polyHIPE <sub>S(NH<sub>2</sub>)</sub> /1.35%GO  | MB             | 1250.3 μg/g         | The sorbent shows broad-spectrum adsorption ability to both cationic and anionic dyes; the synthesis procedure is simple; the monolithic sorbent is cost-effective and ease of recycling |                                                                                                                                                                                     | This work |
|                                                                       | RB             | 1054.1 μg/g         |                                                                                                                                                                                          |                                                                                                                                                                                     |           |
|                                                                       | EY             | 1967.3 μg/g         |                                                                                                                                                                                          |                                                                                                                                                                                     |           |

Tab. S4 Comparison of the photocatalytic activity of polyHIPEs<sub>(NH<sub>2</sub>)</sub>/RGO/Ag<sub>3</sub>PO<sub>4</sub> with some other graphene/semiconductor composites

| Photocatalyst (dosage in mg)                                                             | Dye (dosage in mol)                                | Irradiation source            | Degradation percentages | Time (min)             | Catalytic efficiency (mol mg <sup>-1</sup> min <sup>-1</sup> )                   | Ref.      |
|------------------------------------------------------------------------------------------|----------------------------------------------------|-------------------------------|-------------------------|------------------------|----------------------------------------------------------------------------------|-----------|
| RGO/95%BiVO <sub>4</sub> (100)                                                           | MB and RB (2.7 × 10 <sup>-6</sup> )                | 300 W Xe, >400 nm             | 94% for MB. 87% for RB  | 30                     | 8.5 × 10 <sup>-10</sup> MB,<br>7.8 × 10 <sup>-10</sup> RB                        | 6         |
| RGO/70%CdS (20)                                                                          | RB (5.0 × 10 <sup>-7</sup> )                       | 500 W Xe                      | 95%                     | 80                     | 3.0 × 10 <sup>-10</sup>                                                          | 7         |
| RGO/90%TiO <sub>2</sub> nanotube (20)                                                    | Malachite green oxalate (2.8 × 10 <sup>-6</sup> )  | 450 W Hg                      | 80%                     | 75                     | 1.5 × 10 <sup>-9</sup>                                                           | 8         |
| RGO/99%TiO <sub>2</sub> P25 (30)                                                         | MB (1.1 × 10 <sup>-6</sup> )                       | 100 W Hg, > 400 nm            | 42%                     | 10                     | 1.5 × 10 <sup>-9</sup>                                                           | 9         |
| RGO/94.4%Ag <sub>3</sub> PO <sub>4</sub> (50)                                            | MB, RB and methyl orange (1.0 × 10 <sup>-6</sup> ) | 350 W Xe, >420 nm             | Nearly 100%             | 5                      | 4.0 × 10 <sup>-9</sup>                                                           | 10        |
| GO/98.2%Ag <sub>3</sub> PO <sub>4</sub> (20)                                             | Acid Orange (7.1 × 10 <sup>-9</sup> )              | 300 W Xe,<br>420 < λ < 630 nm | Nearly 100%             | 10                     | 3.5 × 10 <sup>-11</sup>                                                          | 11        |
| GO/92%Ag <sub>3</sub> PO <sub>4</sub> (35)                                               | RB (1.7 × 10 <sup>-6</sup> )                       | 500 W Xe, >420 nm             | Nearly 100%             | 22                     | 2.2 × 10 <sup>-10</sup>                                                          | 12        |
| PolyHIPEs <sub>(NH<sub>2</sub>)</sub> /4.6%RGO/49.7%Ag <sub>3</sub> PO <sub>4</sub> (20) | MB, RB and EY (7.0 × 10 <sup>-7</sup> )            | 350 W Xe, >420 nm             | Nearly 100%             | MB: 20, RB: 40, EY: 35 | 1.8 × 10 <sup>-9</sup> MB, 8.8 × 10 <sup>-10</sup> RB, 1.0 × 10 <sup>-9</sup> EY | This work |

## References

- 1 W. Zhao, Y. Tang, J. Xi and J. Kong, *Applied Surface Science*, 2015, **326**, 276-284.
- 2 L. Meng, X. Zhang, Y. Tang, K. Su and J. Kong, *Scientific Reports*, 2015, **5**, 7910.
- 3 Z.-Y. Sui, Y. Cui, J.-H. Zhu and B.-H. Han, *ACS Applied Materials & Interfaces*, 2013, **5**, 9172-9179.
- 4 Y. Chen, L. Chen, H. Bai and L. Li, *Journal of Materials Chemistry A*, 2013, **1**, 1992-2001.
- 5 d. L. M. Salzano, R. Castaldo, R. Altobelli, L. Gioiella, G. Filippone, G. Gentile and V. Ambrogi, *Carbohydrate Polymers*, 2017, **177**, 347-354.
- 6 Y. Wang, W. Wang, H. Mao, Y. Lu, J. Lu, J. Huang, Z. Ye and B. Lu, *ACS applied materials & interfaces*, 2014, **6**, 12698-12706.
- 7 Z. Gao, N. Liu, D. Wu, W. Tao, F. Xu and K. Jiang, *Applied Surface Science*, 2012, **258**, 2473-2478.
- 8 S. D. Perera, R. G. Mariano, K. Vu, N. Nour, O. Seitz, Y. Chabal and K. J. Balkus, *ACS Catalysis*, 2012, **2**, 949-956.
- 9 H. Zhang, X. Lv, Y. Li, Y. Wang and J. Li, *ACS Nano*, 2010, **4**, 380-386.
- 10 X. Yang, H. Cui, Y. Li, J. Qin, R. Zhang and H. Tang, *ACS Catalysis*, 2013, **3**, 363-369.
- 11 L. Liu, J. Liu and D. D. Sun, *Catalysis Science & Technology*, 2012, **2**, 2525-2532.
- 12 Q. Liang, Y. Shi, W. Ma, Z. Li and X. Yang, *Physical Chemistry Chemical Physics*, 2012, **14**, 15657-15665.
